# Supplementary material
Source: Springer Nature journal article supplement (https://www.springermedizin.de/resource/supplementary/12885_2009_1876_MOESM2_ESM.pdf/9461464)

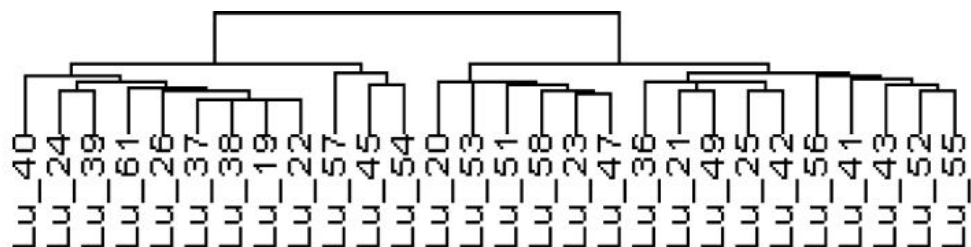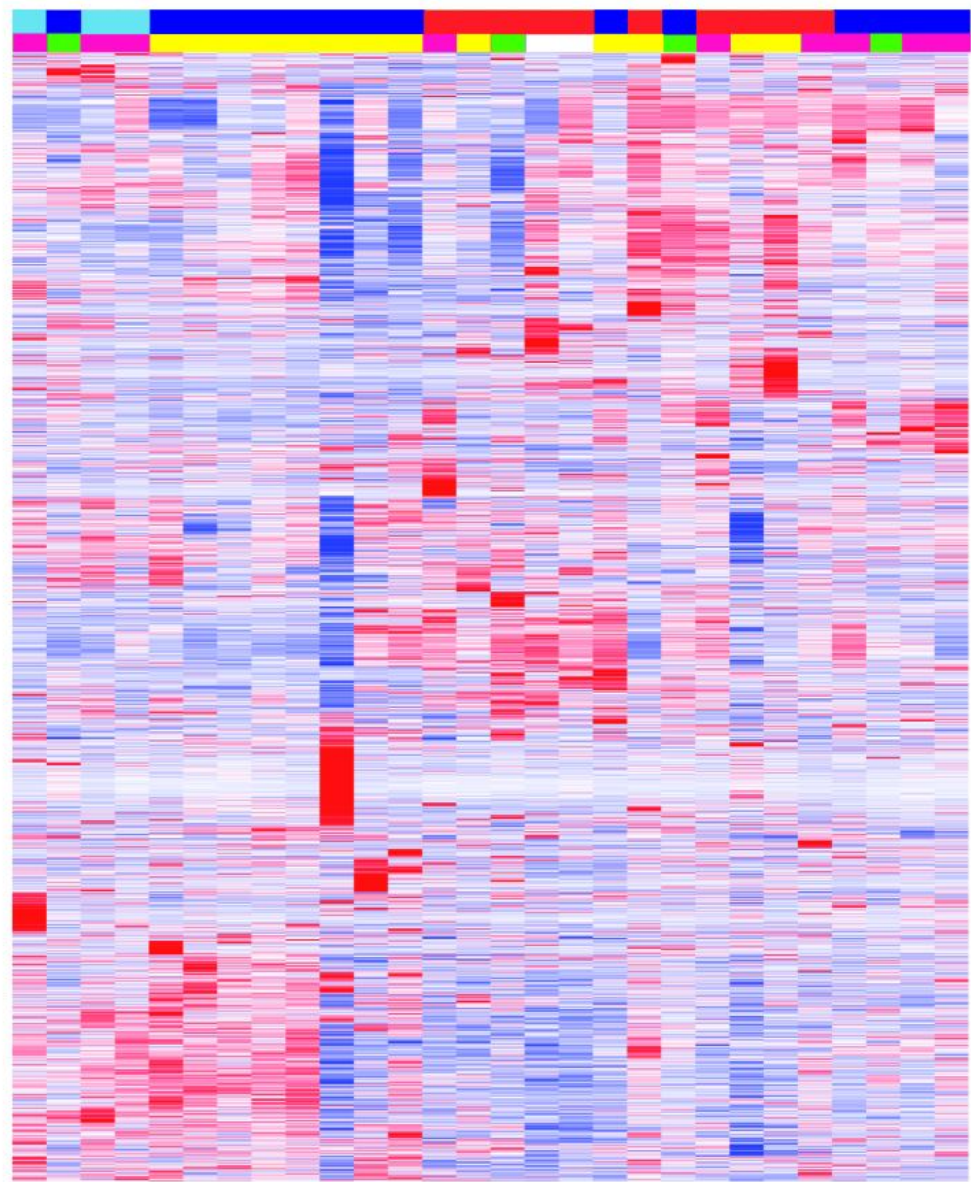

Tumor Grade 1 2 3  
EGFR Score 1 2 3 n.e. □

Supplement: MOESM2 [file 9461464]
